# Supplementary material for: Selective binding and reversible release of riboflavin by polymer-bound zinc(ii) azamacrocycles
Source: Royal Society of Chemistry journal article supplement (doi:10.1039/b107605a), 2001-01-01

## Supporting information

---

### Selective Binding and Reversible Release of Riboflavin by Polymer-bound Zinc(II) Azamacrocycles

---

**Burkhard König,\* Hans-Christoph Gallmeier and Roland Reichenbach-Klinke**

*Institut für Organische Chemie, Universität Regensburg, Regensburg, Germany. Fax: (+49)941-943-1717; Tel: (+49)941-943-4576; E-mail: Burkhard.Koenig@chemie.uni-regensburg.de*

### Figure 3.

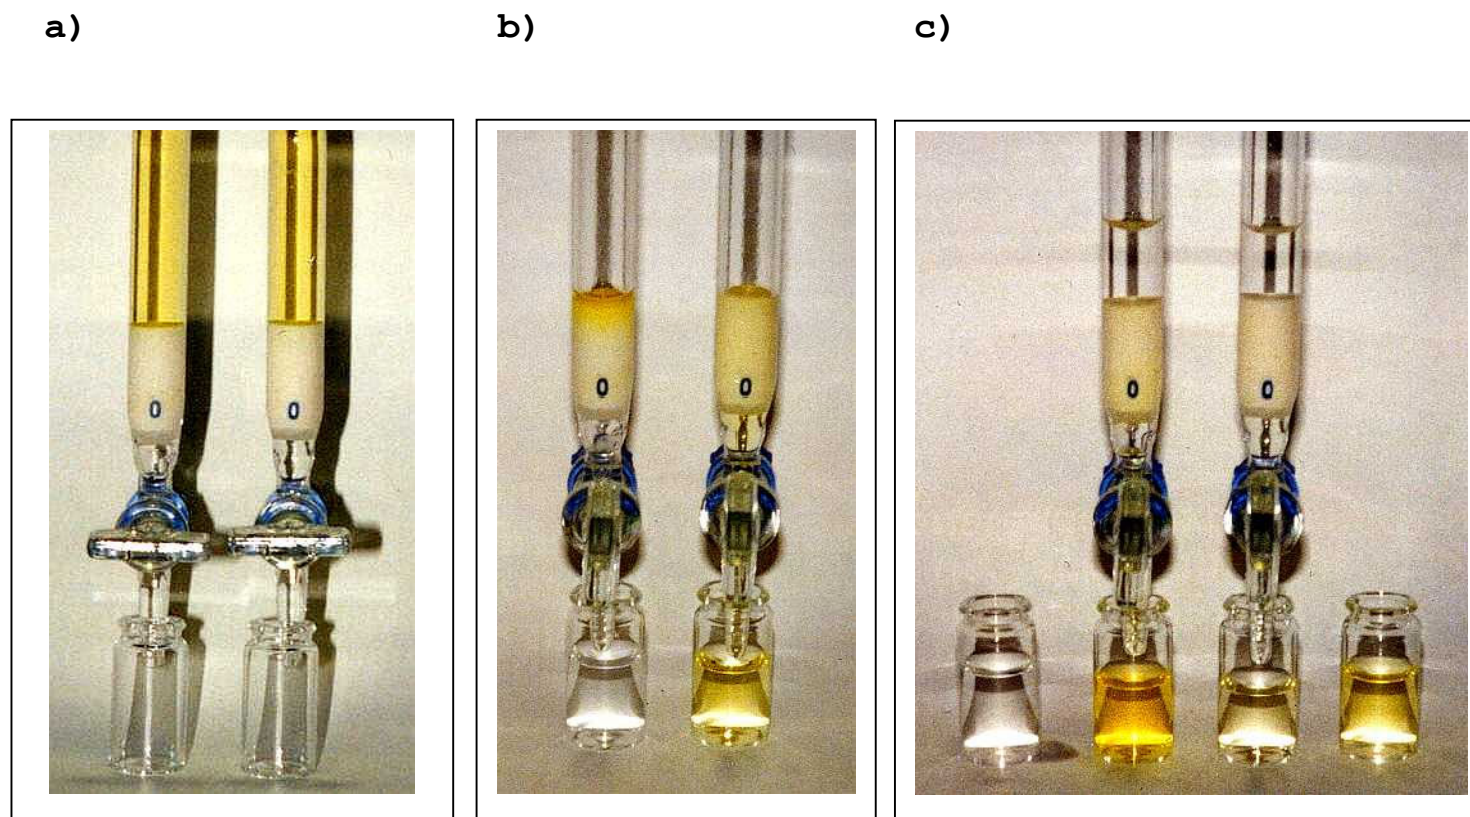

Binding of riboflavin ( $c = 4.9 \times 10^{-5}$  mol/L) from buffered aqueous solution pH 7.4 on **2** (left column). For comparison (right column) Fractogel®EMD loaded with glycine: **a)** before passage of the riboflavin solution through the column; **b)** after passage; **c)** elution with aqueous buffer pH 4.4.

## Figure 4

### Separation of vitamin B2 from a vitamin juice:

- a) Vitamin juice (pH 8); b) passing the column filled with **2**; c) washing of the column with buffer pH 7.4;  
d) eluting riboflavin with aqueous buffer pH 4.4.

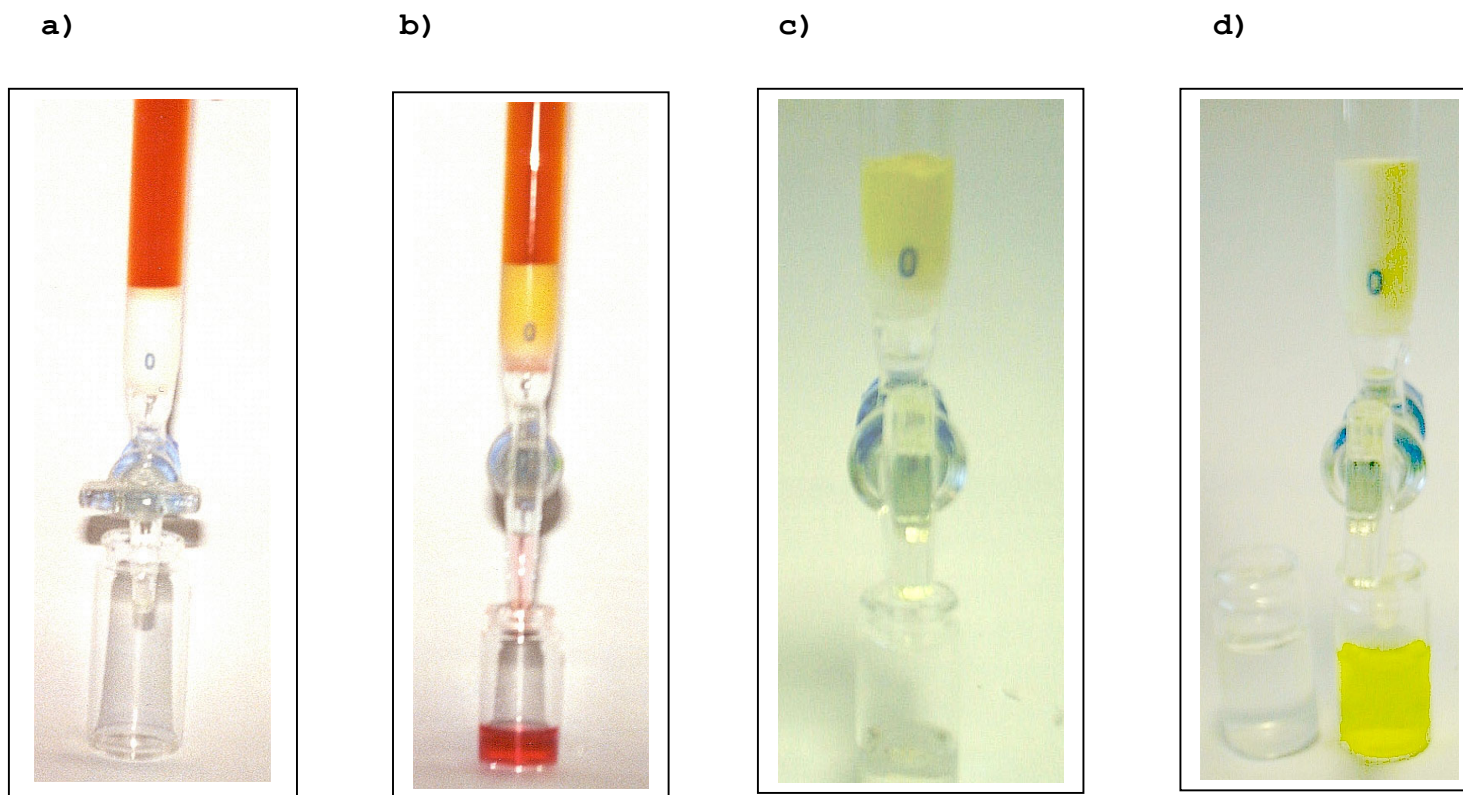

Supplement: b107605a.pdf [file b107605a.pdf]
